# Supplementary material
Source: Springer Nature journal article supplement (https://www.springermedizin.de/resource/supplementary/12974_2009_179_MOESM2_ESM.pdf/9601018)
Supplement: MOESM2 [file 9601018]

## Supplementary Table S2 :

| <i>Protein Name</i>                    | <i>Official Name provided from HUGO Gene Nomenclature Committee (HGNC)</i> |
|----------------------------------------|----------------------------------------------------------------------------|
| <b>AXL</b>                             | AXL receptor tyrosine kinase                                               |
| <b>CCL1/TCA-3</b>                      | Chemokine (C-C motif) ligand 1                                             |
| <b>CCL11/Eotaxin</b>                   | Chemokine (C-C motif) ligand 11                                            |
| <b>CCL12/MCP-5</b>                     | Chemokine (C-C motif) ligand 12                                            |
| <b>CCL17/TARC</b>                      | Chemokine (C-C motif) ligand 17                                            |
| <b>CCL19/MIP-3<math>\beta</math></b>   | Chemokine (C-C motif) ligand 19                                            |
| <b>CCL2/MCP-1</b>                      | Chemokine (C-C motif) ligand 2                                             |
| <b>CCL20/MIP-3<math>\alpha</math></b>  | Chemokine (C-C motif) ligand 20                                            |
| <b>CCL24/ Eotaxin-2</b>                | Chemokine (C-C motif) ligand 24                                            |
| <b>CCL25/TECK</b>                      | Chemokine (C-C motif) ligand 25                                            |
| <b>CCL27/CTACK</b>                     | Chemokine (C-C motif) ligand 27 (Cutaneous T-Cell attracting chemokine)    |
| <b>CCL3/MIP-1<math>\alpha</math></b>   | Chemokine (C-C motif) ligand 3                                             |
| <b>CCL5/RANTES</b>                     | Chemokine (C-C motif) ligand 5                                             |
| <b>CCL9/MIP-1<math>\gamma</math></b>   | Chemokine (C-C motif) ligand 9                                             |
| <b>CD30</b>                            | Cluster of differentiation 30                                              |
| <b>CD40</b>                            | Cluster of differentiation 40                                              |
| <b>CX3CL1/Fractalkine</b>              | Chemokine (C-X3-C motif) ligand 1                                          |
| <b>CXCL1/KC</b>                        | Chemokine (C-X-C motif) ligand 1                                           |
| <b>CXCL10/CRG-2</b>                    | Chemokine (C-X-C motif) ligand 10                                          |
| <b>CXCL12/SDF-1<math>\alpha</math></b> | Chemokine (C-X-C motif) ligand 12 (stromal cell-derived factor 1)          |
| <b>CXCL13/BLC</b>                      | Chemokine (C-X-C motif) ligand 13 (B-cell chemoattractant)                 |
| <b>CXCL-16</b>                         | Chemokine (C-X-C motif) ligand 16                                          |
| <b>CXCL2/MIP-2</b>                     | Chemokine (C-X-C motif) ligand 2                                           |
| <b>CXCL4/PF-4</b>                      | Chemokine (C-X-C motif) ligand 4 (Platelet factor 4)                       |
| <b>CXCL5/LIX</b>                       | Chemokine (C-X-C motif) ligand 5 (LPS induced C-X-C chemokine)             |
| <b>CXCL9/MIG</b>                       | Chemokine (C-X-C motif) ligand 9                                           |
| <b>Fas Ligand</b>                      | Fas ligand                                                                 |
| <b>G-CSF</b>                           | Colony stimulating factor 3 (granulocyte)                                  |
| <b>GM-CSF</b>                          | Colony stimulating factor 2 (granulocyte-macrophage)                       |
| <b>IFN<math>\gamma</math></b>          | Interferon, gamma                                                          |
| <b>IGFBP-3</b>                         | Insulin-like growth factor binding protein 3                               |
| <b>IGFBP-5</b>                         | Insulin-like growth factor binding protein                                 |
| <b>IGFBP-6</b>                         | Insulin-like growth factor binding protein 6                               |
| <b>IL-10</b>                           | Interleukin-10                                                             |
| <b>IL-12p40/p70</b>                    | Interleukin-12B (natural killer cell stimulatory factor 2, p40)            |
| <b>IL-12p70</b>                        | Interleukin-12A (natural killer cell stimulatory factor 1, p35)            |
| <b>IL-13</b>                           | Interleukin-13                                                             |
| <b>IL-17</b>                           | Interleukin-17                                                             |
| <b>IL-1<math>\alpha</math></b>         | Interleukin-1, alpha                                                       |
| <b>IL-1<math>\beta</math></b>          | Interleukin-1, beta                                                        |
| <b>IL-2</b>                            | Interleukin-2                                                              |
| <b>IL-3</b>                            | Interleukin-3                                                              |
| <b>IL-3Rb</b>                          | Interleukin-3 receptor                                                     |
| <b>IL-4</b>                            | Interleukin-4                                                              |
| <b>IL-5</b>                            | Interleukin-5                                                              |
| <b>IL-6</b>                            | Interleukin-6                                                              |

|                               |                                                             |
|-------------------------------|-------------------------------------------------------------|
| <b>IL-9</b>                   | Interleukin-9                                               |
| <b>Leptin</b>                 | Leptin                                                      |
| <b>LeptinR</b>                | Leptin receptor                                             |
| <b>L-Selectin</b>             | Leucocyte Selectin (Lymphocyte adhesion molecule 1)         |
| <b>M-CSF</b>                  | Colony stimulating factor 1 (macrophage)                    |
| <b>P-Selectin</b>             | Platelet selectin                                           |
| <b>SCF</b>                    | KIT ligand                                                  |
| <b>sTNFRI</b>                 | Soluble TNF receptor I                                      |
| <b>sTNFRII</b>                | Soluble TNF receptor II                                     |
| <b>TIMP-1</b>                 | TIMP metalloproteinase inhibitor 1                          |
| <b>TNF<math>\alpha</math></b> | Tumor necrosis factor (TNF superfamily, member 2)           |
| <b>TPO</b>                    | Trombopoietin (megakaryocyte growth and development factor) |
| <b>VCAM-1</b>                 | Vascular cell adhesion molecule 1                           |
| <b>VEGF</b>                   | Vascular endothelial growth factor                          |
| <b>XCL1/Lymphotactin</b>      | Chemokine (C motif) ligand 1                                |
